# Supplementary material
Source: PubMed Central journal article supplement (PMC3789647)
Supplement: NIHMS501714-supplement-01.pdf [file NIHMS501714-supplement-01.pdf]

Sensitized with 100 µg/kg anti-DNP IgE (i.v.) at day -1

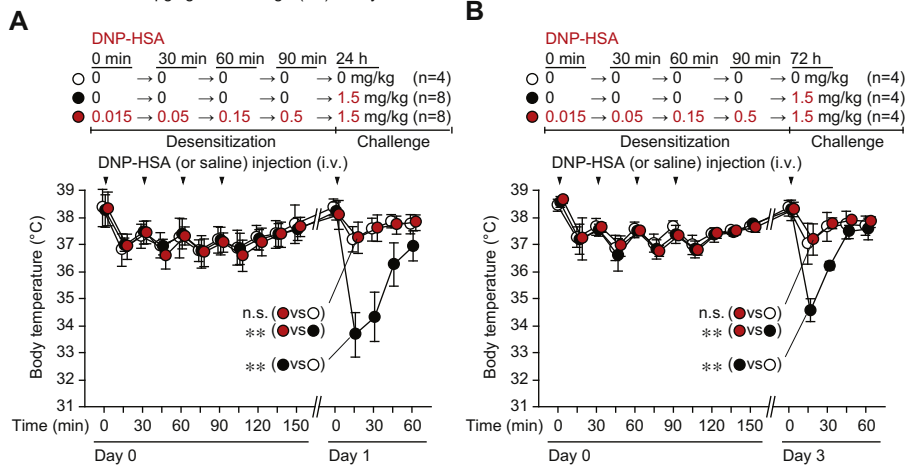

**FIG E1.** Rapid desensitization can prevent PSA reactions *in vivo* if mice are challenged with the target dose of antigen 1 or 3 days after the last desensitization dose. **A** and **B**, Mice were sensitized (intravenously) with 100 µg/kg anti-DNP IgE. Body temperature was measured at the indicated time points after injection (intravenously) with sequentially increasing amounts of DNP-HSA (*Desensitization*). Body temperature was measured at the indicated time points after injection (intravenously) with a target dose of DNP-HSA (*Challenge*) injected 1 (Fig E1, **A**) or 3 (Fig E1, **B**) days after the last desensitization dose. N = 4 to 8 mice per group from 2 to 3 independent experiments. \*\* $P < .01$  and *n.s.* (not significant,  $P > .05$ ). Body temperatures at 15 minutes after 1.5 mg/kg DNP-HSA challenge were compared by using 1-way ANOVA, followed by the Bonferroni test. *i.v.*, Intravenously.

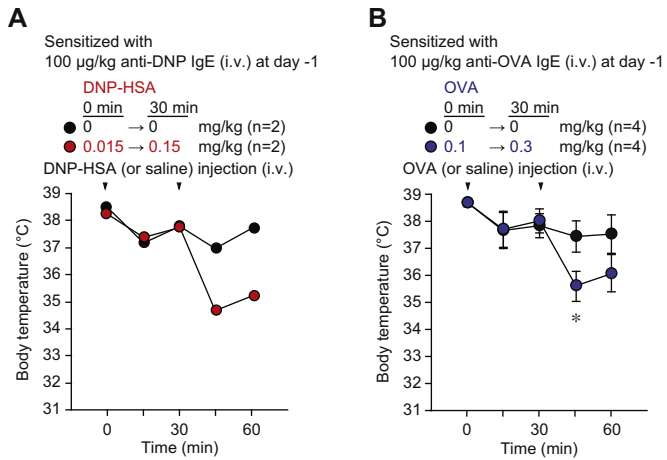

**FIG E2.** Evidence that exposure to appropriate, gradually increasing doses of antigen are needed to effectively desensitize mice to a target dose of antigen *in vivo*. Mice were sensitized (intravenously) with 100  $\mu\text{g}/\text{kg}$  anti-DNP (**A**) or 100  $\mu\text{g}/\text{kg}$  anti-OVA (**B**) IgE. The next day, body temperature was measured at the indicated time points after injection (intravenous) with the indicated concentrations of DNP-HSA (Fig E2, **A**) or OVA (Fig E2, **B**). N = 2 to 4 mice per group from 1 to 2 independent experiments. \* $P < .05$ . Body temperatures at 45 minutes were compared by using the unpaired Student *t* test. *i.v.*, Intravenously.

**A**

Example of experimental protocol (DNP Desens. + DNP Challenge)

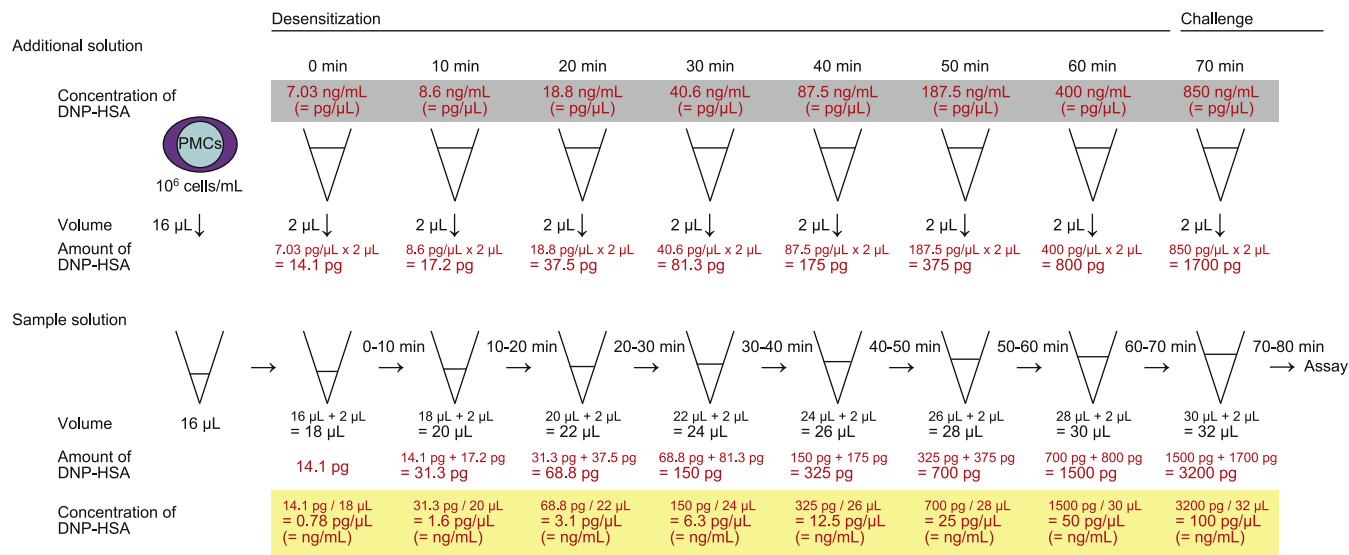

**B**

|                                    |                       | Desensitization |      |      |       |       |       |        |        |        |        |                                                                                                                      |
|------------------------------------|-----------------------|-----------------|------|------|-------|-------|-------|--------|--------|--------|--------|----------------------------------------------------------------------------------------------------------------------|
|                                    |                       | Time            | 0    | 0-10 | 10-20 | 20-30 | 30-40 | 40-50  | 50-60  | 60-70  |        |                                                                                                                      |
| No Desens.                         | Additional solution   | volume (µL)     | 16   | 2    | 2     | 2     | 2     | 2      | 2      | 2      | 2      | Fig 2, C,<br>Fig 4, A, C, D,<br>Fig 5, C<br>Fig 6, B - E,<br>Fig 7, A - D,<br>Fig E8, Fig E9, A,<br>Fig E10, Fig E11 |
|                                    |                       | amount (pg)     | 0    | 0    | 0     | 0     | 0     | 0      | 0      | 0      | 0      |                                                                                                                      |
|                                    | concentration (ng/mL) | 0               | 0    | 0    | 0     | 0     | 0     | 0      | 0      | 0      |        |                                                                                                                      |
|                                    | Sample solution       | volume (µL)     | 16   | 18   | 20    | 22    | 24    | 26     | 28     | 30     | 30     |                                                                                                                      |
|                                    | amount (pg)           | 0               | 0    | 0    | 0     | 0     | 0     | 0      | 0      | 0      |        |                                                                                                                      |
|                                    | concentration (ng/mL) | 0               | 0    | 0    | 0     | 0     | 0     | 0      | 0      | 0      |        |                                                                                                                      |
| DNP Desens.<br>(Alexa DNP Desens.) | Additional solution   | volume (µL)     | 16   | 2    | 2     | 2     | 2     | 2      | 2      | 2      | 2      | Fig 2, C,<br>Fig 4, A, C, D,<br>Fig 5, C<br>Fig 6, B - E,<br>Fig 7, A - D,<br>Fig E8, Fig E9, A,<br>Fig E10, Fig E11 |
|                                    |                       | amount (pg)     | 0    | 14.1 | 17.2  | 37.5  | 81.3  | 175    | 375    | 800    | 1500   |                                                                                                                      |
|                                    | concentration (ng/mL) | 0               | 7.0  | 8.6  | 18.8  | 40.6  | 87.5  | 187.5  | 400    | 850    |        |                                                                                                                      |
|                                    | Sample solution       | volume (µL)     | 16   | 18   | 20    | 22    | 24    | 26     | 28     | 30     | 30     |                                                                                                                      |
|                                    | amount (pg)           | 0               | 14.1 | 31.3 | 68.8  | 150   | 325   | 700    | 1500   | 3200   |        |                                                                                                                      |
|                                    | concentration (ng/mL) | 0               | 0.78 | 1.6  | 3.1   | 6.3   | 12.5  | 25     | 50     | 100    |        |                                                                                                                      |
| OVA Desens.                        | Additional solution   | volume (µL)     | 16   | 2    | 2     | 2     | 2     | 2      | 2      | 2      | 2      | Fig 4, F,<br>Fig E9, B                                                                                               |
|                                    |                       | amount (pg)     | 0    | 2250 | 2750  | 6000  | 13000 | 28000  | 60000  | 128000 | 240000 |                                                                                                                      |
|                                    | concentration (ng/mL) | 0               | 1125 | 1375 | 3000  | 6500  | 14000 | 30000  | 64000  | 120000 |        |                                                                                                                      |
|                                    | Sample solution       | volume (µL)     | 16   | 18   | 20    | 22    | 24    | 26     | 28     | 30     | 30     |                                                                                                                      |
|                                    | amount (pg)           | 0               | 2250 | 5000 | 11000 | 24000 | 52000 | 112000 | 240000 | 480000 |        |                                                                                                                      |
|                                    | concentration (ng/mL) | 0               | 125  | 250  | 500   | 1000  | 2000  | 4000   | 8000   | 16000  |        |                                                                                                                      |

Red: DNP-HSA (or Alexa 633-labeled DNP-HSA) Blue: OVA

**FIG E3.** Details of *in vitro* experimental protocols. **A**, Example of the protocol for analyzing the desensitization, followed in some experiments by challenge, of mouse peritoneal mast cells (PMCs) *in vitro*. Samples of PMCs in Tyrode’s buffer received sequentially, at the times indicated in the Figure, small volumes (“Additional solutions”) of either Tyrode’s buffer (as a control) or Tyrode’s buffer containing antigen (DNP-HSA) (or, in other experiments shown in Fig E3, B or C, Alexa 633-labeled DNP-HSA, ovalbumin [OVA] or anti-IgE [ $\alpha$ -IgE]). This yielded samples (“Sample solutions”) of PMCs in Tyrode’s buffer containing the final amounts and concentrations of antigen or  $\alpha$ -IgE shown in yellow. **B** and **C**, Details of the *in vitro* experimental protocols used in various Figures.

C

|                                                                          |                     | Desensitization       |    |      |       |       |       |       |        |        | Challenge |        |                                                                                                                        |
|--------------------------------------------------------------------------|---------------------|-----------------------|----|------|-------|-------|-------|-------|--------|--------|-----------|--------|------------------------------------------------------------------------------------------------------------------------|
|                                                                          |                     | Time                  | 0  | 0-10 | 10-20 | 20-30 | 30-40 | 40-50 | 50-60  | 60-70  | 70-80     |        |                                                                                                                        |
| No Desens. + No Challenge                                                | Additional solution | volume (µL)           | 16 | 2    | 2     | 2     | 2     | 2     | 2      | 2      | 2         | 2      |                                                                                                                        |
|                                                                          |                     | amount (pg)           | 0  | 0    | 0     | 0     | 0     | 0     | 0      | 0      | 0         | 0      |                                                                                                                        |
|                                                                          |                     | concentration (ng/mL) | 0  | 0    | 0     | 0     | 0     | 0     | 0      | 0      | 0         | 0      |                                                                                                                        |
|                                                                          | Sample solution     | volume (µL)           | 16 | 18   | 20    | 22    | 24    | 26    | 28     | 30     | 32        |        |                                                                                                                        |
|                                                                          |                     | amount (pg)           | 0  | 0    | 0     | 0     | 0     | 0     | 0      | 0      | 0         |        |                                                                                                                        |
|                                                                          |                     | concentration (ng/mL) | 0  | 0    | 0     | 0     | 0     | 0     | 0      | 0      | 0         |        |                                                                                                                        |
| No Desens. + DNP Challenge<br>(No Desens. + Alexa DNP Challenge)         | Additional solution | volume (µL)           | 16 | 2    | 2     | 2     | 2     | 2     | 2      | 2      | 2         | 2      | Fig 2, C - G, M, P,<br>Fig 4, A, C, E,<br>Fig 5, C<br>Fig 6, B, C, E,<br>Fig 7, C, D,<br>Fig 9, A,<br>Fig E10, Fig E11 |
|                                                                          |                     | amount (pg)           | 0  | 0    | 0     | 0     | 0     | 0     | 0      | 0      | 0         | 3200   |                                                                                                                        |
|                                                                          |                     | concentration (ng/mL) | 0  | 0    | 0     | 0     | 0     | 0     | 0      | 0      | 0         | 1600   |                                                                                                                        |
|                                                                          | Sample solution     | volume (µL)           | 16 | 18   | 20    | 22    | 24    | 26    | 28     | 30     | 32        |        |                                                                                                                        |
|                                                                          |                     | amount (pg)           | 0  | 0    | 0     | 0     | 0     | 0     | 0      | 0      | 0         | 3200   |                                                                                                                        |
|                                                                          |                     | concentration (ng/mL) | 0  | 0    | 0     | 0     | 0     | 0     | 0      | 0      | 0         | 100    |                                                                                                                        |
| DNP Desens. + DNP Challenge<br>(Alexa DNP Desens. + Alexa DNP Challenge) | Additional solution | volume (µL)           | 16 | 2    | 2     | 2     | 2     | 2     | 2      | 2      | 2         | 2      | Fig 2, C - G, M, P,<br>Fig 4, A, C, E,<br>Fig 5, C<br>Fig 6, B, C, E,<br>Fig 7, C, D,<br>Fig 9, A,<br>Fig E10, Fig E11 |
|                                                                          |                     | amount (pg)           | 0  | 14.1 | 17.2  | 37.5  | 81.3  | 175   | 375    | 800    | 1700      |        |                                                                                                                        |
|                                                                          |                     | concentration (ng/mL) | 0  | 7.0  | 8.6   | 18.8  | 40.6  | 87.5  | 187.5  | 400    | 850       |        |                                                                                                                        |
|                                                                          | Sample solution     | volume (µL)           | 16 | 18   | 20    | 22    | 24    | 26    | 28     | 30     | 32        |        |                                                                                                                        |
|                                                                          |                     | amount (pg)           | 0  | 14.1 | 31.3  | 68.8  | 150   | 325   | 700    | 1500   | 3200      |        |                                                                                                                        |
|                                                                          |                     | concentration (ng/mL) | 0  | 0.78 | 1.6   | 3.1   | 6.3   | 12.5  | 25     | 50     | 100       |        |                                                                                                                        |
| No Desens. + OVA Challenge                                               | Additional solution | volume (µL)           | 16 | 2    | 2     | 2     | 2     | 2     | 2      | 2      | 2         | 2      | Fig 2, K, M,<br>Fig 4, F,<br>Fig 9, B                                                                                  |
|                                                                          |                     | amount (pg)           | 0  | 0    | 0     | 0     | 0     | 0     | 0      | 0      | 0         | 512000 |                                                                                                                        |
|                                                                          |                     | concentration (ng/mL) | 0  | 0    | 0     | 0     | 0     | 0     | 0      | 0      | 0         | 256000 |                                                                                                                        |
|                                                                          | Sample solution     | volume (µL)           | 16 | 18   | 20    | 22    | 24    | 26    | 28     | 30     | 32        |        |                                                                                                                        |
|                                                                          |                     | amount (pg)           | 0  | 0    | 0     | 0     | 0     | 0     | 0      | 0      | 0         | 512000 |                                                                                                                        |
|                                                                          |                     | concentration (ng/mL) | 0  | 0    | 0     | 0     | 0     | 0     | 0      | 0      | 0         | 16000  |                                                                                                                        |
| OVA Desens. + OVA Challenge                                              | Additional solution | volume (µL)           | 16 | 2    | 2     | 2     | 2     | 2     | 2      | 2      | 2         | 2      | Fig 2, K, M,<br>Fig 4, F,<br>Fig 9, B                                                                                  |
|                                                                          |                     | amount (pg)           | 0  | 2250 | 2750  | 6000  | 13000 | 28000 | 60000  | 128000 | 272000    |        |                                                                                                                        |
|                                                                          |                     | concentration (ng/mL) | 0  | 1125 | 1375  | 3000  | 6500  | 14000 | 30000  | 64000  | 136000    |        |                                                                                                                        |
|                                                                          | Sample solution     | volume (µL)           | 16 | 18   | 20    | 22    | 24    | 26    | 28     | 30     | 32        |        |                                                                                                                        |
|                                                                          |                     | amount (pg)           | 0  | 2250 | 5000  | 11000 | 24000 | 52000 | 112000 | 240000 | 512000    |        |                                                                                                                        |
|                                                                          |                     | concentration (ng/mL) | 0  | 125  | 250   | 500   | 1000  | 2000  | 4000   | 8000   | 16000     |        |                                                                                                                        |
| OVA Desens. + DNP Challenge                                              | Additional solution | volume (µL)           | 16 | 2    | 2     | 2     | 2     | 2     | 2      | 2      | 2         | 2      | Fig 2, M                                                                                                               |
|                                                                          |                     | amount (pg)           | 0  | 2250 | 2750  | 6000  | 13000 | 28000 | 60000  | 128000 | 3200      |        |                                                                                                                        |
|                                                                          |                     | concentration (ng/mL) | 0  | 1125 | 1375  | 3000  | 6500  | 14000 | 30000  | 64000  | 1600      |        |                                                                                                                        |
|                                                                          | Sample solution     | volume (µL)           | 16 | 18   | 20    | 22    | 24    | 26    | 28     | 30     | 32        |        |                                                                                                                        |
|                                                                          |                     | amount (pg)           | 0  | 2250 | 5000  | 11000 | 24000 | 52000 | 112000 | 240000 | 3200      |        |                                                                                                                        |
|                                                                          |                     | concentration (ng/mL) | 0  | 125  | 250   | 500   | 1000  | 2000  | 4000   | 8000   | 100       |        |                                                                                                                        |
| DNP Desens. + OVA Challenge                                              | Additional solution | volume (µL)           | 16 | 2    | 2     | 2     | 2     | 2     | 2      | 2      | 2         | 2      | Fig 2, M                                                                                                               |
|                                                                          |                     | amount (pg)           | 0  | 14.1 | 17.2  | 37.5  | 81.3  | 175   | 375    | 800    | 512000    |        |                                                                                                                        |
|                                                                          |                     | concentration (ng/mL) | 0  | 7.0  | 8.6   | 18.8  | 40.6  | 87.5  | 187.5  | 400    | 256000    |        |                                                                                                                        |
|                                                                          | Sample solution     | volume (µL)           | 16 | 18   | 20    | 22    | 24    | 26    | 28     | 30     | 32        |        |                                                                                                                        |
|                                                                          |                     | amount (pg)           | 0  | 14.1 | 31.3  | 68.8  | 150   | 325   | 700    | 1500   | 512000    |        |                                                                                                                        |
|                                                                          |                     | concentration (ng/mL) | 0  | 0.78 | 1.6   | 3.1   | 6.3   | 12.5  | 25     | 50     | 16000     |        |                                                                                                                        |
| No Desens. + α-IgE Challenge                                             | Additional solution | volume (µL)           | 16 | 2    | 2     | 2     | 2     | 2     | 2      | 2      | 2         | 2      | Fig 2, P                                                                                                               |
|                                                                          |                     | amount (pg)           | 0  | 0    | 0     | 0     | 0     | 0     | 0      | 0      | 0         | 16000  |                                                                                                                        |
|                                                                          |                     | concentration (ng/mL) | 0  | 0    | 0     | 0     | 0     | 0     | 0      | 0      | 0         | 8000   |                                                                                                                        |
|                                                                          | Sample solution     | volume (µL)           | 16 | 18   | 20    | 22    | 24    | 26    | 28     | 30     | 32        |        |                                                                                                                        |
|                                                                          |                     | amount (pg)           | 0  | 0    | 0     | 0     | 0     | 0     | 0      | 0      | 0         | 16000  |                                                                                                                        |
|                                                                          |                     | concentration (ng/mL) | 0  | 0    | 0     | 0     | 0     | 0     | 0      | 0      | 0         | 500    |                                                                                                                        |
| α-IgE Desens. + α-IgE Challenge                                          | Additional solution | volume (µL)           | 16 | 2    | 2     | 2     | 2     | 2     | 2      | 2      | 2         | 2      | Fig 2, P                                                                                                               |
|                                                                          |                     | amount (pg)           | 0  | 70.3 | 85.9  | 187.5 | 406.3 | 875   | 1875   | 4000   | 8500      |        |                                                                                                                        |
|                                                                          |                     | concentration (ng/mL) | 0  | 35.2 | 43.0  | 93.8  | 203.1 | 437.5 | 937.5  | 2000   | 4250      |        |                                                                                                                        |
|                                                                          | Sample solution     | volume (µL)           | 16 | 18   | 20    | 22    | 24    | 26    | 28     | 30     | 32        |        |                                                                                                                        |
|                                                                          |                     | amount (pg)           | 0  | 70.3 | 156.3 | 343.8 | 750   | 1625  | 3500   | 7500   | 16000     |        |                                                                                                                        |
|                                                                          |                     | concentration (ng/mL) | 0  | 3.9  | 7.8   | 15.6  | 31.3  | 62.5  | 125    | 250    | 500       |        |                                                                                                                        |
| DNP Desens. + α-IgE Challenge                                            | Additional solution | volume (µL)           | 16 | 2    | 2     | 2     | 2     | 2     | 2      | 2      | 2         | 2      | Fig 2, P                                                                                                               |
|                                                                          |                     | amount (pg)           | 0  | 14.1 | 17.2  | 37.5  | 81.3  | 175   | 375    | 800    | 16000     |        |                                                                                                                        |
|                                                                          |                     | concentration (ng/mL) | 0  | 7.0  | 8.6   | 18.8  | 40.6  | 87.5  | 187.5  | 400    | 8000      |        |                                                                                                                        |
|                                                                          | Sample solution     | volume (µL)           | 16 | 18   | 20    | 22    | 24    | 26    | 28     | 30     | 32        |        |                                                                                                                        |
|                                                                          |                     | amount (pg)           | 0  | 14.1 | 31.3  | 68.8  | 150   | 325   | 700    | 1500   | 16000     |        |                                                                                                                        |
|                                                                          |                     | concentration (ng/mL) | 0  | 0.78 | 1.6   | 3.1   | 6.3   | 12.5  | 25     | 50     | 500       |        |                                                                                                                        |
| α-IgE Desens. + DNP Challenge                                            | Additional solution | volume (µL)           | 16 | 2    | 2     | 2     | 2     | 2     | 2      | 2      | 2         | 2      | Fig 2, P                                                                                                               |
|                                                                          |                     | amount (pg)           | 0  | 70.3 | 85.9  | 187.5 | 406.3 | 875   | 1875   | 4000   | 3200      |        |                                                                                                                        |
|                                                                          |                     | concentration (ng/mL) | 0  | 35.2 | 43.0  | 93.8  | 203.1 | 437.5 | 937.5  | 2000   | 1600      |        |                                                                                                                        |
|                                                                          | Sample solution     | volume (µL)           | 16 | 18   | 20    | 22    | 24    | 26    | 28     | 30     | 32        |        |                                                                                                                        |
|                                                                          |                     | amount (pg)           | 0  | 70.3 | 156.3 | 343.8 | 750   | 1625  | 3500   | 7500   | 3200      |        |                                                                                                                        |
|                                                                          |                     | concentration (ng/mL) | 0  | 3.9  | 7.8   | 15.6  | 31.3  | 62.5  | 125    | 250    | 100       |        |                                                                                                                        |

Red; DNP-HSA (or Alexa 633-labeled DNP-HSA) Blue; OVA Green; α-IgE

FIG E3. (Continued)

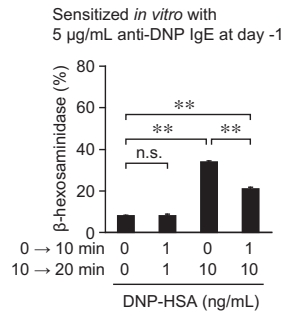

**FIG E4.** Evidence that exposure to appropriate, gradually increasing doses of antigen are needed to effectively desensitize mice to a target dose of antigen *in vitro*. Purified PMCs were sensitized with 5  $\mu$ g/mL anti-DNP IgE and challenged in a 2-step protocol (without washing between) with the indicated concentrations of DNP-HSA. Percentage of  $\beta$ -hexosaminidase release was measured after 20 minutes. N = 4 per group. \*\* $P$  < .01 and *n.s.* (not significant,  $P$  > .05).

Sensitized with 100  $\mu\text{g}/\text{kg}$  anti-DNP IgE (i.v.) at day -1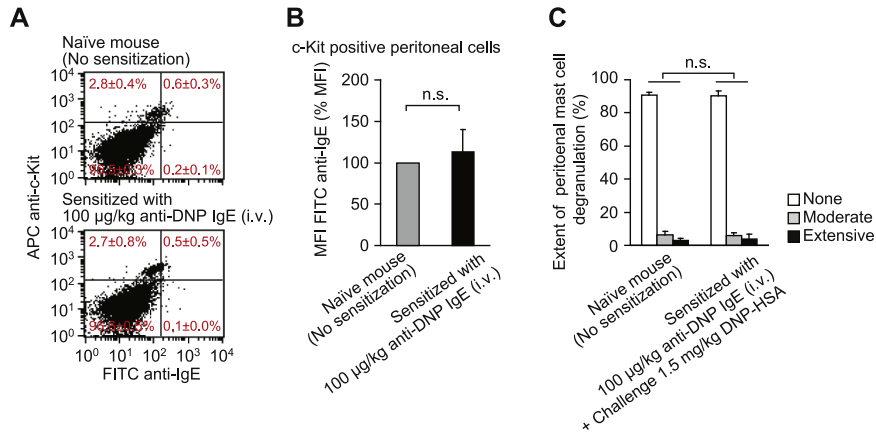

**FIG E5.** Intravenous injection of anti-DNP IgE (100  $\mu\text{g}/\text{kg}$ ) does not efficiently sensitize PMCs *in vivo*. **A**, Representative dot plots of surface IgE levels and c-Kit expression on peritoneal cells isolated from individual naïve (*No sensitization*) or anti-DNP IgE-sensitized mice. Nine mice, each of which produced similar results, were tested for each group. The average percentage of cells in each quadrant from 9 individual mice is shown in red. **B**, MFI of cell-surface IgE molecules in c-Kit<sup>+</sup> PMCs in Fig E5, A. Data were normalized by using MFI from naïve mice as 100%; to test for statistical significance, values were compared with a hypothetical value of 100% by using the 1-sample *t* test. **C**, Extent of PMc degranulation (percentage of MCs exhibiting extensive [ $>50\%$  of granules in that cell exhibiting evidence of degranulation], moderate [10% to 50% of granules affected], or no [none;  $<10\%$  granules affected] degranulation was quantified by using Giemsa-stained slides); comparisons between the indicated experimental conditions were tested for statistical significance by using the  $\chi^2$  test. \* $P < .05$  and *n.s.* (not significant,  $P > .05$ ). *i.v.*, Intravenously.

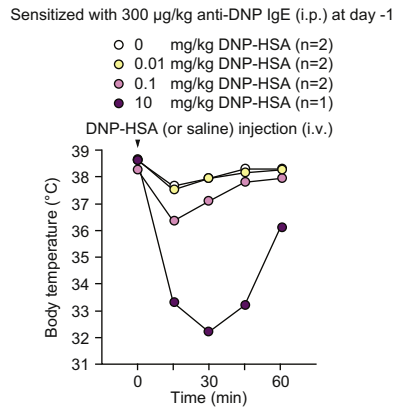

**FIG E6.** Pilot experiment testing responses to various doses of antigen challenge in sensitized mice. Mice were sensitized (intraperitoneally) with 300  $\mu\text{g}/\text{kg}$  anti-DNP IgE. The next day, body temperature was measured after a single challenge (intravenously) with DNP-HSA. N = 1 to 2 mice per group from 1 experiment. *i.p.*, Intraperitoneally; *i.v.*, intravenously.

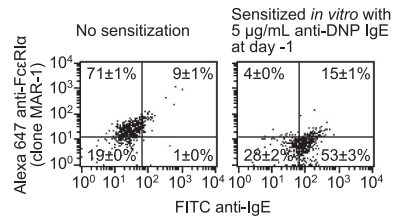

**FIG E7.** IgE sensitization blocks binding of anti-FcεR1α antibody (clone MAR-1) to FcεR1α. PMCs were cultured without (*left*) or with (*right*) 5 μg/mL anti-DNP IgE for 16 to 24 hours and then stained with FITC anti-IgE antibody and Alexa Fluor 647 anti-FcεR1α antibody. Representative *dot plots* of surface IgE and FcεR1α levels are shown. The average percentage of cells in each quadrant is shown; averages were calculated from 6 samples per group from 2 independent experiments, each using PMCs pooled from 3 to 5 mice.



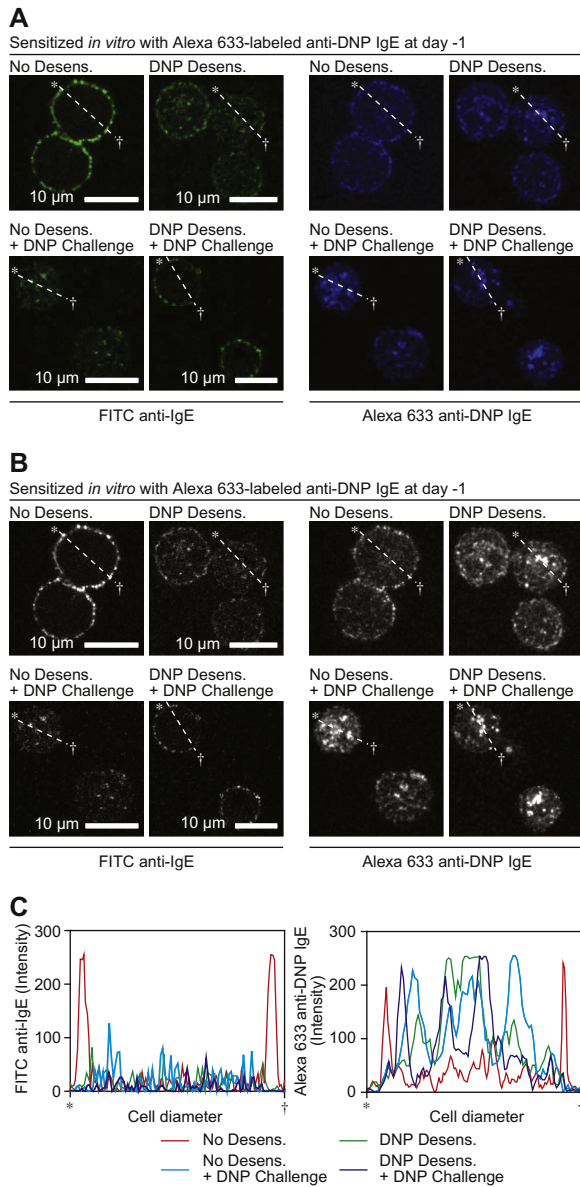

**FIG E8. A and B,** Confocal microscopic images of IgE internalization during rapid desensitization shown in color (Fig E8, A) or black and white (Fig E8, B; for easier visualization of signal). Primary isolated PMCs were sensitized with 5  $\mu\text{g}/\text{mL}$  Alexa Fluor 633-labeled anti-DNP IgE and then desensitized with 0.78  $\rightarrow$  50  $\text{ng}/\text{mL}$  DNP-HSA. Representative confocal images showing staining for cell-surface IgE (detected by using FITC anti-IgE) and Alexa Fluor 633-labeled anti-DNP IgE; FITC (*left panels*) and Alexa Fluor 633 (*right panels*) signals are shown in separate panels to facilitate visualization of each fluorophore. Four images per group from 2 independent experiments, each using PMCs pooled from 3 to 5 mice, were examined; one representative image is shown in each panel. **C,** Line profiles of fluorescence intensity, depicting the intensity of fluorescence measured at various points along the cell transects shown in Fig E8, A.

Sensitized *in vitro* with both 5  $\mu$ g/mL anti-DNP and 5  $\mu$ g/mL anti-OVA IgE at day -1

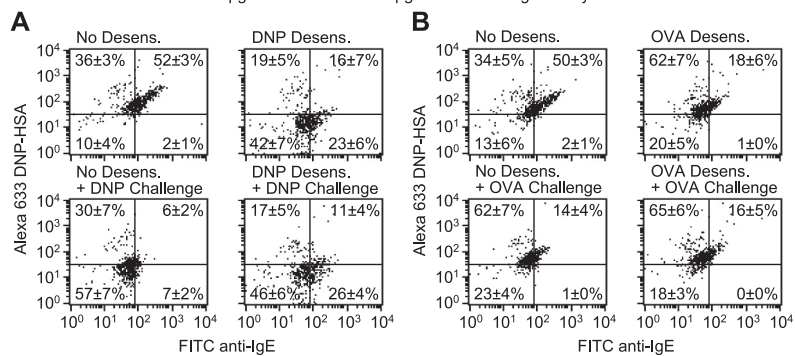

**FIG E9.** Internalization of antigen-specific IgE during rapid desensitization. Primary isolated PMCs were sensitized with both anti-DNP and anti-OVA IgE and then desensitized (0.78  $\rightarrow$  50 ng/mL DNP-HSA [A] or 125  $\rightarrow$  8,000 ng/mL OVA [B]) and challenged (100 ng/mL DNP-HSA [Fig E9, A] or 16,000 ng/mL OVA [Fig E9, B]) by using the protocol in Fig E3. After desensitization/challenge, the PMCs were stained with FITC anti-IgE antibody and Alexa Fluor 633-labeled DNP-HSA on ice. Representative *dot plots* show total IgE (FITC) and anti-DNP IgE (Alexa Fluor 633) levels on the cell surface. N = 6 per group from 3 independently isolated populations of PMCs (each pooled from 3-5 mice).

Sensitized *in vitro* with 5  $\mu$ g/mL anti-DNP IgE at day -1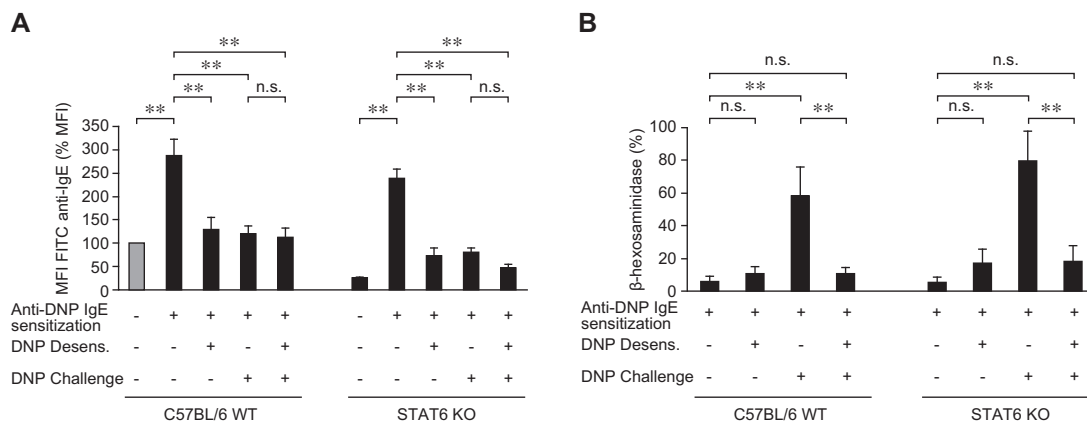

**FIG E10.** Rapid desensitization of STAT6 knockout PMCs *in vitro*. Primary isolated PMCs from C57BL/6 wild-type (*WT*) control mice and STAT6 knockout (*KO*) mice were sensitized with 5  $\mu$ g/mL anti-DNP IgE and treated the next day with DNP-HSA by using the desensitization protocol shown in Fig 2 and Fig E3. **A**, MFI of cell-surface IgE normalized by using the MFI from WT unstimulated PMCs (gray bar) as 100%; values were compared with a hypothetical value of 100% by using the 1-sample *t* test to test for statistical significance. **B**,  $\beta$ -Hexosaminidase release. Fig E10, *A* and *B*, *N* = 6 samples per group from 2 independent experiments, each using PMCs pooled from 3 to 5 mice. \*\**P* < .01 and *n.s.* (not significant, *P* > .05).

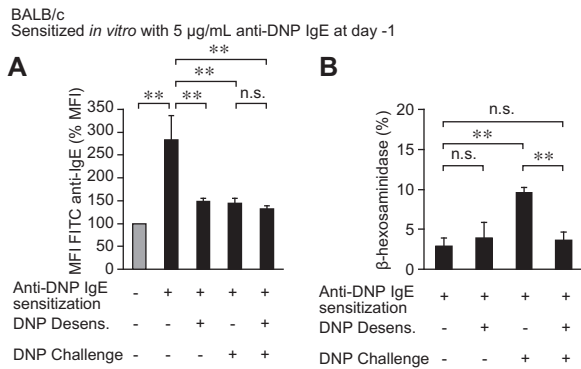

**FIG E11.** Rapid desensitization of BALB/c PMCs *in vitro*. Primary isolated PMCs from BALB/c mice were sensitized with 5  $\mu$ g/mL anti-DNP IgE and treated the next day with DNP-HSA by using the desensitization protocol shown in Fig 2 and E3. **A**, The MFI of cell-surface IgE normalized by using the MFI from wild-type unstimulated PMCs (gray bar) as 100%; values were compared with a hypothetical value of 100% by using the 1-sample *t* test to test for statistical significance. **B**,  $\beta$ -Hexosaminidase release. N = 6 samples per group from 2 independent experiments, each using PMCs pooled from 3 to 5 mice. \*\**P* < .01 and *n.s.* (not significant, *P* > .05).

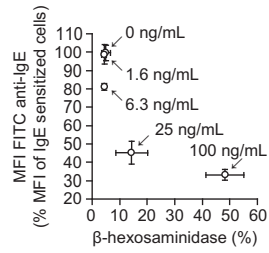

**FIG E12.** Susceptibility of PMCs to antigen-induced degranulation and IgE internalization. Purified PMCs were sensitized with 5  $\mu$ g/mL anti-DNP IgE and then challenged with a single dose of DNP-HSA (0, 1.6, 6.3, 25, or 100 ng/mL). Percentage  $\beta$ -hexosaminidase release (from Fig 2, A) and cell-surface IgE levels (from Fig 4, B) are plotted on the same graph.

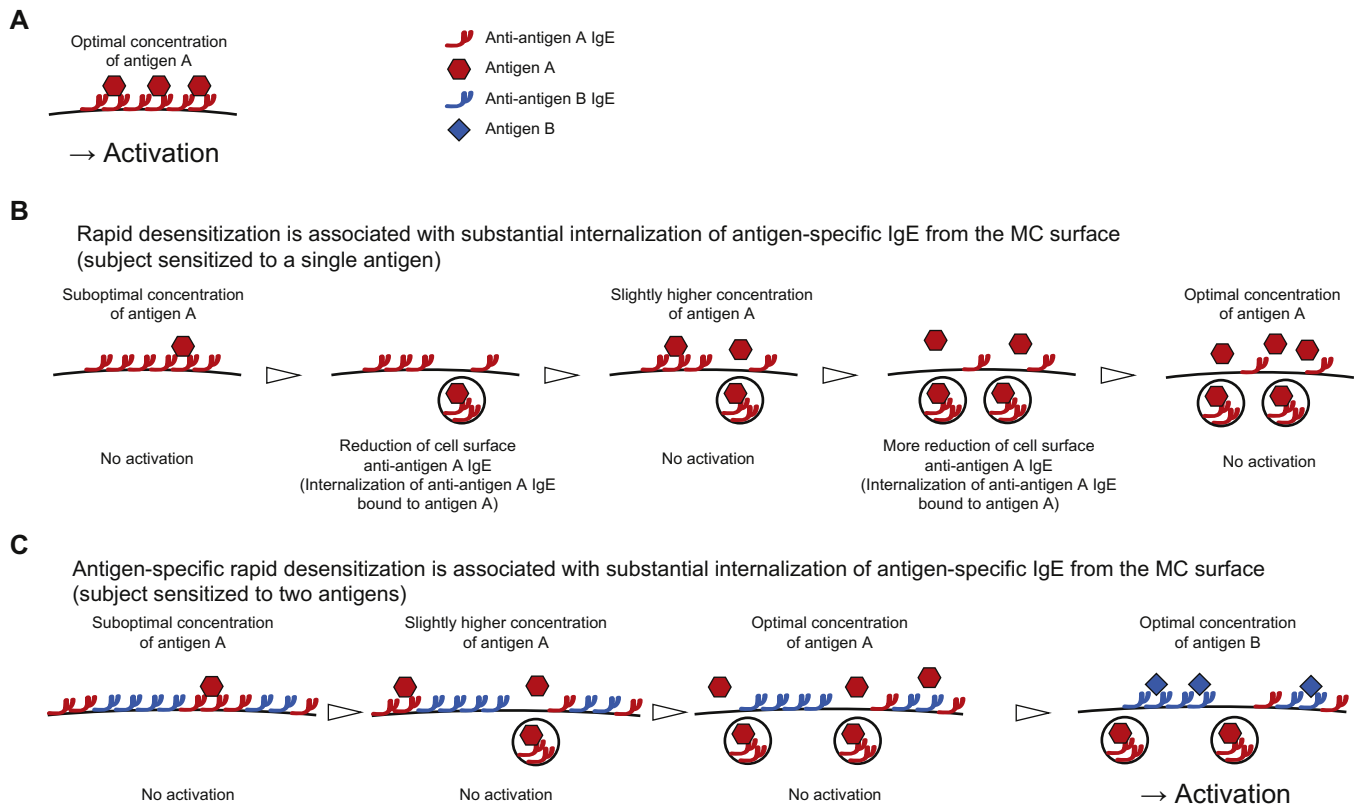

**FIG E13.** Our hypothesized mechanism of rapid desensitization of MCs. **A**, An optimal concentration of antigen A can activate MCs sensitized with anti-antigen A IgE. **B**, Sequentially increasing the concentration of antigen A reduces anti-antigen A IgE levels on the MC surface (through internalization of anti-antigen A IgE bound to antigen A). **C**, Rapid desensitization is associated with substantial internalization of IgE from the MC surface in an antigen-specific manner. Accordingly, in a subject sensitized to both antigen A and antigen B, antigen B can still activate MCs that have been desensitized to antigen A.

Sensitized *in vitro* with 5 µg/mL anti-DNP IgE at day -1

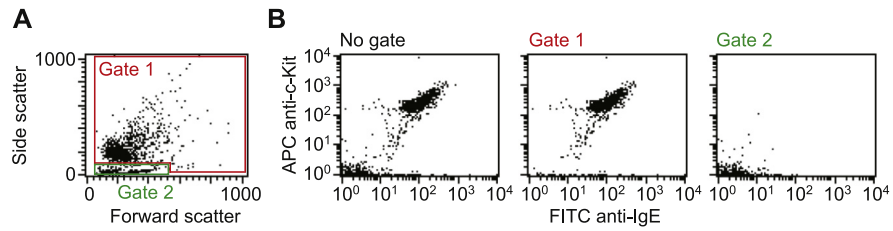

**FIG E14.** Flow cytometric PMC gating. For flow cytometric analysis of PMCs (Figs 4-7, E7, and E9-E12), samples were gated as shown in (A) (gate 1 in forward/side scatter plots) to select c-Kit and IgE double-positive PMCs. B, Greater than 99% of the cells in gate 1 (from Fig E14, A) are c-Kit<sup>+</sup> PMCs.
